# Supplementary material
Source: MDPI journal article supplement (https://www.mdpi.com/2071-1050/16/3/1172)
Supplement: s1 [file s1]

## Supplementary Materials

Figure S1. Scheme of input/output information given in Revit® and OCL.

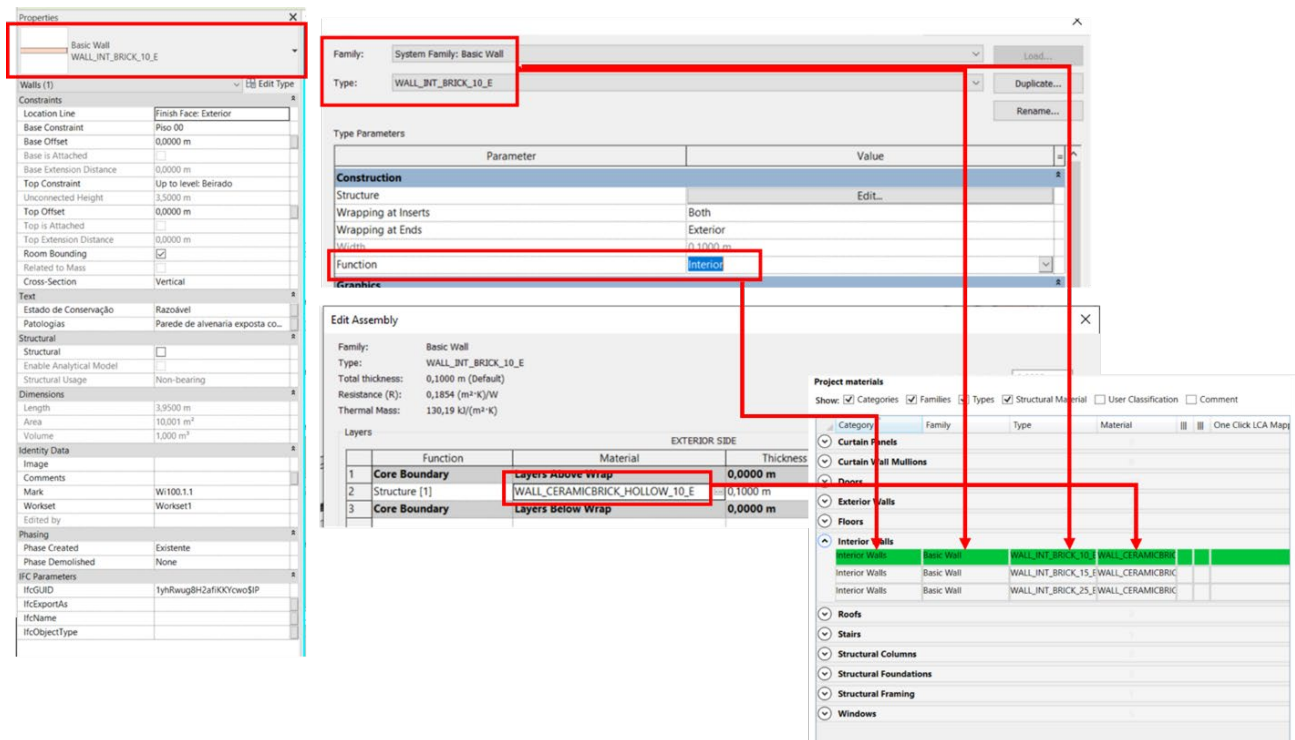

Figure S2. 'Internal walls' correctly mapped in the plugin and manually modified in the online version appear as 'external walls' in the final mapping step.

| Recognized from               | CLASS             | MATERIAL                      | QUANTITY | QTY_TYPE | THICKNI |  |
|-------------------------------|-------------------|-------------------------------|----------|----------|---------|--|
| Your recognized mapping!      | EXTERNA<br>L WALL | WALL_CERAMICBRICK_HOLLOW_25_E | 41.28    | M2       | 250     |  |
| wall_ceramicbrick_hollow_25_e | INTERNAL ...      | Basic Wall                    |          |          |         |  |

  

|                                            |         |        |
|--------------------------------------------|---------|--------|
| 1.2.3 External walls                       | 9.36 m2 | Delete |
| 1.3.2 Internal walls, partitions and doors | 10 m2   | Delete |
| 1.3.2 Internal walls, partitions and doors | 125 m2  | Delete |
| 1.3.2 Internal walls, partitions and doors | 41 m2   | Delete |

Figure S3. The automatic mapping can lead to duplicated environmental impact.

|             |             |                     |                       |         |                                     |
|-------------|-------------|---------------------|-----------------------|---------|-------------------------------------|
| door_wood_e | DOOR        | DOOR WOOD E, 2 rows | 1.4.2 Façade openings | 23 m2   | Plywood, generic, 4-50 mm (0.16-    |
| glass_e     | DOOR        | GLASS E, 2 rows     | 1.4.2 Façade openings | 8.84 m2 | Steel door with glass, exterior use |
| glass_e     | EXTERNA ... | Painel de sistema   | 1.2.3 External walls  | 79 m2   | Precast glass fibre reinforced con  |

**Figure S4.** The unidentified materials: names are crucial to enable automatic mapping.

Unidentified or problematic data: 6 / 40.28 % of volume You only need to map items once. We remember your choices. Delete all < 1 % Delete all < 0.1 %

| Imported data                 |             |                       |                                            |          |         | Map data to                     |
|-------------------------------|-------------|-----------------------|--------------------------------------------|----------|---------|---------------------------------|
| Material                      | Class       | Comment               | Building Parts                             | Quantity | Share   | Target resource                 |
| roof_fibercement_e            | ROOF        | Basic Roof            | 1.5 Roof                                   | 54.28 m3 | 15.41 % | Fibre cement boards, 1300 kg/m3 |
| wall_ceramicbrick_hollow_25_e | EXTERNA...  | Basic Wall            | 1.2.3 External walls                       | 144 m2   | 10.25 % | Choose the mapping              |
| wall_ceramicbrick_hollow_15_e | INTERNAL... | Basic Wall            | 1.3.2 Internal walls, partitions and doors | 125 m2   | 5.34 %  | Choose the mapping              |
| wall_ceramicbrick_hollow_21_e | EXTERNA...  | WALL CERAMICBRICK HOI | 1.2.3 External walls                       | 77 m2    | 4.57 %  | Choose the mapping              |
| wall_ceramicbrick_hollow_25_e | INTERNAL... | Basic Wall            | 1.3.2 Internal walls, partitions and doors | 41 m2    | 2.93 %  | Choose the mapping              |
| floor_int_wood_2_e            | SLAB        | Floor                 | 1.2.1 Frame (beams, columns and slabs)     | 211 m2   | 1.2 %   | Choose the mapping              |

**Figure S5.** Names given to the materials inside Revit® 2022.

Material Browser - Brick, Ceramic, Hollow, 25, E

Project Materials: All

Name: **Brick, Ceramic, Hollow, 25, E**

Clad - White

Ceramic Tile, Roof, P

Ceramic Tile, Roof, 15x15, White, P

**Brick, Ceramic, Hollow, 25, E**

Brick, Ceramic, Hollow, 21, E

Brick, Ceramic, Hollow, 15, E

Brick, Ceramic, Hollow, 11, E

Identity | Graphics | Appearance | Physical | Thermal

Name: **Brick, Ceramic, Hollow, 25, E**

Descriptive Information

Description: Ceramic brick, 25x30x20cm, Existente

Class: Masonry

Comments:

Keywords:

Product Information

Manufacturer:

Model:

Cost:

URL:

**Figure S6.** OCL mapping after correcting names in Revit®.

|                               |             |                               |                      |        |         |                                  |
|-------------------------------|-------------|-------------------------------|----------------------|--------|---------|----------------------------------|
| brick, ceramic, hollow, 25, e | EXTERNA...  | Basic Wall                    | 1.2.3 External walls | 144 m2 | 10.25 % | Red brick, average production, U |
| brick, ceramic, hollow, 15, e | INTERNAL... | Basic Wall                    | 1.3.2 Internal walls | 125 m2 | 5.34 %  | Red brick, average production, U |
| brick, ceramic, hollow, 21, e | EXTERNA...  | Brick, Ceramic, Hollow, 21, E | 1.2.3 External walls | 77 m2  | 4.57 %  | Red brick, average production, U |

**Figure S7.** Some unidentified materials after name correction.

| Material               | Class         | Comment          | Building Parts                  | Quantity | Share   | Target resource                     |
|------------------------|---------------|------------------|---------------------------------|----------|---------|-------------------------------------|
| ceramic tile roof, a   | ROOF          | Basic Roof       | 1.5 Roof                        | 374 m2   | 14.25 % | Roofing tile from clay (terracotta) |
| rockwool insulation, a | HORIZONTAL... | Compound Ceiling | 2.1.4 Wall and ceiling finishes | 205 m2   | 2.69 %  | Rock wool insulation panel, L= 0.0  |

**Figure S8.** Material quantities and classification information: (1) Before mapping (selecting the respective datasets for each material); (2) After mapping.

| CLASS             | MATERIAL                                | QUANTITY | QTY_T |
|-------------------|-----------------------------------------|----------|-------|
| EXTERNAL WALL     | Glass, P                                | 78.8     | m2    |
| DOOR              | Wood, Door leaf, R                      | 4.38     | m2    |
| DOOR              | Wood, Door leaf, R                      | 16.03    | m2    |
| HORIZONTAL FINISH | RockWool, Insulation, A                 | 205.26   | m2    |
| HORIZONTAL FINISH | Gypsum Plasterboard, White, A           | 205.26   | m2    |
| SLAB              | Ceramic Tile, bathroom, 60x60, White, P | 11.89    | m2    |
| SLAB              | Wood, Floor, 2, P                       | 191.85   | m2    |
| ROOF              | Concrete, C12/15                        | 52.18    | m3    |
| ROOF              | Ceramic Tile, Roof, A                   | 374.36   | m2    |
| SLAB              | Concrete, C12/15                        | 125.21   | m3    |
| STAIRS            | Concrete, C12/15                        | 2.74     | m3    |
| BEAM              | Concrete, C12/15                        | 2.43     | m3    |
| COLUMN            | Concrete, C12/15                        | 2.27     | m3    |
| EXTERNAL WALL     | Plaster, White, A                       | 183.17   | m2    |
| EXTERNAL WALL     | Insulation, EPS, A                      | 7.33     | m3    |
| EXTERNAL WALL     | Brick, Ceramic, Hollow, 25, E           | 144.41   | m2    |
| EXTERNAL WALL     | Brick, Ceramic, Hollow, 11, E           | 9.36     | m2    |
| INTERNAL WALL     | Ceramic Tile, bathroom, 15x15, White, A | 99.03    | m2    |
| INTERNAL WALL     | Brick, Ceramic, Hollow, 10, E           | 10.19    | m2    |
| INTERNAL WALL     | Brick, Ceramic, Hollow, 15, E           | 95.15    | m2    |
| WINDOW            | Aluminum, Black, P                      | 7.55     | m2    |
| WINDOW            | Glass, P                                | 8.44     | m2    |
| DOOR              | Aluminum, Black, P                      | 6.25     | m2    |
| DOOR              | Glass, P                                | 8.84     | m2    |
| DOOR              | Handle, Door, Metal, P                  | 4        | unit  |
| DOOR              | Handle, Door, Metal, R                  | 8        | unit  |
| SLAB              | Mortar                                  | 6.12     | m3    |

(1)

| CLASS             | MATERIAL             | QUANTITY | QTY_TYPE | COMMENT                               |
|-------------------|----------------------|----------|----------|---------------------------------------|
| SLAB              | Ready-mix concrete   | 125.21   | m3       | Floor                                 |
| ROOF              | Ready-mix concrete   | 52.18    | m3       | Basic Roof                            |
| WALL              | Terracotta brick wit | 144.41   | m2       | Basic Wall                            |
| WALL              | Terracotta brick wit | 76.62    | m2       | Brick, Ceramic, Hollow, 21, E, 2 rows |
| FOUNDATION        | Ready-mix concrete   | 15.77    | m3       | Concrete, C12/15, 2 rows              |
| WALL              | Red brick, average   | 95.15    | m2       | Basic Wall                            |
| WALL              | Terracotta brick wit | 67.82    | m2       | Brick, Ceramic, Hollow, 25, E, 2 rows |
| SLAB              | Cement mortar, grc   | 6.12     | m3       | Mortar, 2 rows                        |
| WALL              | Gypsum plaster, 11   | 483.58   | m2       | Plaster, White, A, 2 rows             |
| HORIZONTAL FINISH | Gypsum plaster (gy   | 205.26   | m2       | Compound Ceiling                      |
| SLAB              | Sawn timber, plane   | 191.85   | m2       | Floor                                 |
| WALL              | Cement mortar, grc   | 3.43     | m3       | Mortar, 3 rows                        |
| WALL              | Gypsum plaster, 11   | 183.17   | m2       | Basic Wall                            |
| STAIRS            | Ready-mix concrete   | 2.74     | m3       | Cast-In-Place Stair                   |
| BEAM              | Ready-mix concrete   | 2.43     | m3       | STRUCTURE_BEAM                        |
| COLUMN            | Ready-mix concrete   | 2.27     | m3       | Pilar Rectangular                     |
| WALL              | Terracotta brick wit | 9.36     | m2       | Basic Wall                            |
| WALL              | Red brick, average   | 10.19    | m2       | Basic Wall                            |
| WALL              | Natural stone slabs  | 45.44    | m2       | Limestone, Knocker, E, 4 rows         |
| DOOR              | Coated glass, single | 8.84     | m2       | Glass, P, 2 rows                      |
| WINDOW            | Coated glass, single | 8.44     | m2       | Janela                                |
| DOOR              | Sawn timber, plane   | 16.03    | m2       | DOOR_INT                              |
| DOOR              | Sawn timber, plane   | 4.38     | m2       | DOOR_INT                              |
| WALL              | Coated glass, single | 78.8     | m2       | Painel de sistema                     |
| ROOF              | Roofing tile from cl | 374.36   | m2       | Basic Roof                            |
| HORIZONTAL FINISH | Rock wool insulation | 205.26   | m2       | Compound Ceiling                      |
| WALL              | EPS insulation pan   | 7.33     | m3       | Basic Wall                            |
| WALL              | Ceramic glazed tile  | 99.03    | m2       | Basic Wall                            |

(2)
